# Supplementary material for: Navigating in Virtual Environments: Does a Map or a Map-Based Description Presented Beforehand Help?
Source: MDPI journal article supplement (doi:10.3390/brainsci11060773), 2021-06-10
Supplement: s1 [file s1]

**Table S1.** Means and standard deviations (in brackets) of log-transformed scores of route retracing (errors), pointing (errors) and path drawing (accuracy) by group.

|                      | Map before Navigation Group | Description before Navigation Group | Only Navigation Group |
|----------------------|-----------------------------|-------------------------------------|-----------------------|
| Route retracing task | 0.70 (0.26)                 | 0.64 (0.19)                         | 0.70 (0.16)           |
| Pointing task        | 1.11 (0.76)                 | 1.36 (0.66)                         | 1.66 (0.50)           |
| Path drawing task    | 1.24 (0.08)                 | 1.00 (0.26)                         | 1.06 (0.15)           |

**Table S2.** Correlations between individual difference measures and recall task performance in the “map before navigation” group.

|                                                    | Route Retracing Task | Pointing Task | Path Drawing Task |
|----------------------------------------------------|----------------------|---------------|-------------------|
| Corsi Task (backward)                              | 0.130                | 0.037         | -0.065            |
| Digit Span Task (backward)                         | -0.136               | -0.170        | -0.074            |
| Mental Rotations Test                              | 0.032                | -0.310        | -0.089            |
| Spatial Anxiety Scale                              | -0.085               | -0.231        | 0.047             |
| SDSR—Sense of direction—preference for survey mode | -0.142               | 0.003         | -0.078            |
| SDSR—Knowledge and use of cardinal points          | -0.117               | -0.143        | -0.194            |
| SDSR—preference for landmark-route mode            | -0.090               | 0.195         | -0.087            |

**Table S3.** Correlations between individual difference measures and recall task performance in the “description before navigation” group.

|                                                    | Route Retracing Task | Pointing Task | Path Drawing Task |
|----------------------------------------------------|----------------------|---------------|-------------------|
| Corsi Task (backward)                              | -0.137               | 0.053         | 0.102             |
| Digit Span Task (backward)                         | -0.070               | -0.074        | 0.076             |
| Mental Rotations Test                              | -0.216               | 0.061         | 0.182             |
| Spatial Anxiety Scale                              | 0.027                | -0.307        | 0.040             |
| SDSR—Sense of direction—preference for survey mode | -0.270               | 0.001         | -0.193            |
| SDSR—Knowledge and use of cardinal points          | -0.037               | 0.125         | 0.046             |
| SDSR—preference for landmark-route mode            | -0.196               | -0.100        | -0.449            |

**Table S4.** Correlations between individual difference measures and recall task performance in the “only navigation” group.

|                                                    | Route Retracing Task | Pointing Task | Path Drawing Task |
|----------------------------------------------------|----------------------|---------------|-------------------|
| Corsi Task (backward)                              | -0.214               | 0.025         | -0.258            |
| Digit Span Task (backward)                         | <b>-0.464</b>        | 0.060         | -0.112            |
| Mental Rotations Test                              | -0.146               | 0.079         | -0.184            |
| Spatial Anxiety Scale                              | 0.301                | -0.030        | -0.133            |
| SDSR—Sense of direction—preference for survey mode | -0.166               | -0.278        | -0.230            |
| SDSR—Knowledge and use of cardinal points          | -0.252               | -0.173        | -0.157            |
| SDSR—preference for landmark-route mode            | -0.277               | -0.308 *      | -0.003            |

The values in bold express medium-high degree of relations.
